# Supplementary material for: Dopamine controls whether new declarative information updates reactivated memories through reconsolidation
Source: PubMed Central journal article supplement — Proc Natl Acad Sci U S A. 2021 Jul 12;118(29):e2025275118. doi: 10.1073/pnas.2025275118 (PMC8307459; doi:10.1073/pnas.2025275118), 2021-07-12
Supplement: pnas.2025275118.sd01.pdf [file pnas.2025275118.sd01.pdf]

| Dataset Figure 1A |            |                | Exploration time (s) |       |              |       |          |       |
|-------------------|------------|----------------|----------------------|-------|--------------|-------|----------|-------|
|                   |            |                | Training             |       | Reactivation |       | Test     |       |
|                   |            |                | A                    | B     | A            | C     | Familiar | Novel |
| VEH<br>+5 min     | TEST<br>AD | VEH<br>-20 min | 21.51                | 17.66 | 10.18        | 20.62 | 21.72    | 21.83 |
|                   |            |                | 23.91                | 18.76 | 22.33        | 27.79 | 27.95    | 33.70 |
|                   |            |                | 48.37                | 37.72 | 31.65        | 39.93 | 21.30    | 37.66 |
|                   |            |                | 34.07                | 31.87 | 9.72         | 29.41 | 16.28    | 22.18 |
|                   |            |                | 12.08                | 14.57 | 5.48         | 18.11 | 5.92     | 16.26 |
|                   |            |                | 27.32                | 29.65 | 15.39        | 17.98 | 30.18    | 49.09 |
|                   |            |                | 30.06                | 28.36 | 24.36        | 39.81 | 18.08    | 45.10 |
|                   |            |                | 21.04                | 19.94 | 23.20        | 69.79 | 33.31    | 36.24 |
|                   |            |                | 26.88                | 28.56 | 18.12        | 26.48 | 20.58    | 45.79 |
|                   |            | 41.63          | 34.87                | 20.14 | 33.55        | 18.91 | 33.76    |       |
|                   |            | 32.93          | 29.10                | 10.38 | 21.25        | 24.99 | 27.66    |       |
|                   |            | 18.77          | 24.58                | 16.48 | 14.45        | 17.32 | 55.79    |       |
|                   |            | 18.84          | 20.04                | 15.38 | 33.17        | 14.11 | 34.43    |       |
|                   |            | 17.02          | 17.82                | 33.66 | 65.88        | 20.72 | 31.16    |       |
|                   |            | 30.21          | 22.72                | 17.58 | 33.27        | 24.22 | 45.05    |       |
|                   |            | 31.23          | 38.20                | 16.22 | 21.92        | 28.90 | 44.58    |       |
|                   |            | 16.58          | 17.42                | 8.88  | 16.78        | 17.35 | 17.28    |       |
|                   |            | 16.69          | 17.22                | 27.08 | 52.13        | 15.91 | 34.23    |       |
|                   | 16.89      | 15.13          | 16.12                | 21.86 | 20.89        | 41.58 |          |       |
|                   | 21.26      | 16.66          | 10.19                | 17.48 | 12.46        | 11.74 |          |       |
|                   | 25.15      | 25.24          | 24.77                | 33.33 | 23.58        | 36.02 |          |       |
|                   | 26.18      | 33.95          | 19.81                | 26.11 | 36.57        | 58.61 |          |       |
|                   | 18.14      | 21.73          | 16.85                | 32.89 | 12.49        | 23.15 |          |       |
|                   | 29.11      | 31.89          | 11.86                | 26.84 | 10.19        | 16.57 |          |       |
|                   | 20.04      | 27.54          | 17.32                | 44.56 | 32.22        | 39.68 |          |       |
|                   | 28.31      | 29.15          | 16.71                | 39.10 | 25.42        | 37.59 |          |       |
|                   | 20.28      | 22.76          | 22.73                | 32.83 | 20.27        | 31.13 |          |       |
|                   | 27.53      | 24.96          | 24.92                | 36.14 | 22.79        | 25.79 |          |       |
|                   | 50.55      | 37.44          | 13.85                | 39.14 | 22.52        | 43.01 |          |       |
|                   | 25.89      | 30.64          | 23.12                | 35.77 | 18.85        | 39.04 |          |       |
|                   | 28.86      | 38.86          | 23.81                | 21.81 | 20.88        | 26.83 |          |       |
|                   | 29.61      | 31.41          | 36.82                | 63.40 | 28.73        | 42.52 |          |       |
|                   | 19.00      | 24.18          | 21.39                | 23.98 | 13.39        | 23.03 |          |       |
|                   | 35.42      | 26.76          | 13.42                | 17.45 | 25.36        | 42.07 |          |       |
|                   | 29.62      | 30.27          | 9.12                 | 21.35 | 16.75        | 23.74 |          |       |
|                   | 25.73      | 22.39          | 11.98                | 19.81 | 23.69        | 39.87 |          |       |
|                   | 47.21      | 36.17          | 18.52                | 31.56 | 19.62        | 42.98 |          |       |
|                   | 27.69      | 31.13          | 29.52                | 43.83 | 12.15        | 20.79 |          |       |
|                   | 19.25      | 21.79          | 20.96                | 31.64 | 6.17         | 12.61 |          |       |
|                   | 12.98      | 16.68          | 19.28                | 30.82 | 11.88        | 20.75 |          |       |
|                   | 27.09      | 37.44          | 7.46                 | 18.53 | 30.56        | 31.46 |          |       |
|                   | 28.12      | 25.44          | 22.50                | 43.55 | 31.43        | 48.55 |          |       |
|                   | 47.50      | 33.40          | 26.91                | 34.55 | 38.06        | 77.54 |          |       |
|                   | 25.56      | 18.11          | 21.13                | 42.44 | 4.78         | 7.79  |          |       |
|                   | 14.24      | 12.24          | 12.78                | 11.25 | 9.60         | 23.20 |          |       |
|                   | 15.46      | 17.52          | 26.81                | 32.78 | 19.57        | 47.69 |          |       |
|                   | 24.98      | 27.61          | 27.72                | 35.97 | 29.71        | 37.57 |          |       |
|                   | 23.61      | 23.80          | 18.90                | 28.87 | 12.46        | 24.27 |          |       |
| 23.56             | 26.26      | 27.86          | 26.19                | 15.55 | 16.92        |       |          |       |
| 20.39             | 18.95      | 17.65          | 42.98                | 15.02 | 27.23        |       |          |       |
| 17.50             | 14.32      | 28.20          | 42.70                | 26.00 | 47.50        |       |          |       |
| 21.67             | 15.77      | 17.78          | 26.46                | 18.65 | 24.95        |       |          |       |
| 29.86             | 32.27      | 13.68          | 18.28                | 30.46 | 46.56        |       |          |       |
| 46.48             | 35.40      | 9.54           | 27.66                | 10.48 | 20.05        |       |          |       |
| 37.30             | 42.56      | 15.97          | 26.68                | 28.87 | 33.45        |       |          |       |
| 17.28             | 15.19      | 10.65          | 26.45                | 22.66 | 52.08        |       |          |       |

|               |            |                |       |       |       |       |       |       |
|---------------|------------|----------------|-------|-------|-------|-------|-------|-------|
|               |            |                | 23.02 | 23.27 | 15.32 | 24.10 | 9.41  | 16.92 |
|               |            |                | 21.34 | 23.61 | 15.89 | 9.96  | 13.98 | 17.88 |
|               |            |                | 37.77 | 29.26 | 19.12 | 69.67 | 15.00 | 34.01 |
|               |            |                | 21.45 | 24.66 | 28.09 | 32.56 | 25.36 | 48.16 |
| ANI<br>+5 min | TEST<br>AD | VEH<br>-20 min | 38.73 | 32.74 | 17.09 | 38.73 | 16.28 | 27.32 |
|               |            |                | 27.07 | 28.30 | 29.50 | 79.06 | 31.08 | 21.73 |
|               |            |                | 21.40 | 19.89 | 25.74 | 38.88 | 37.69 | 27.38 |
|               |            |                | 32.45 | 33.67 | 23.74 | 31.95 | 13.59 | 7.28  |
|               |            |                | 24.74 | 33.04 | 11.57 | 17.29 | 28.88 | 25.66 |
|               |            |                | 27.33 | 28.44 | 20.38 | 37.62 | 36.12 | 44.10 |
|               |            |                | 21.94 | 25.96 | 12.24 | 24.33 | 25.26 | 24.57 |
|               |            |                | 28.05 | 23.77 | 33.23 | 65.11 | 26.47 | 30.19 |
|               |            |                | 21.38 | 22.48 | 14.43 | 41.52 | 20.64 | 18.59 |
|               |            | 20.61          | 17.02 | 39.48 | 69.99 | 26.55 | 27.83 |       |
|               |            | 19.41          | 19.99 | 22.59 | 20.59 | 19.39 | 35.20 |       |
|               |            | 26.73          | 30.36 | 19.65 | 18.45 | 19.39 | 16.38 |       |
|               |            | 19.45          | 15.12 | 14.41 | 26.53 | 11.01 | 22.92 |       |
|               |            | 38.22          | 34.81 | 18.04 | 27.13 | 22.25 | 27.06 |       |
|               |            | 24.18          | 28.53 | 23.44 | 38.79 | 27.70 | 43.65 |       |
|               |            | 28.57          | 33.97 | 10.08 | 31.29 | 21.84 | 34.72 |       |
|               |            | 21.91          | 23.25 | 13.99 | 18.38 | 19.45 | 40.79 |       |
|               |            | 41.94          | 44.02 | 44.11 | 61.59 | 39.42 | 70.98 |       |
|               | 14.16      | 14.41          | 13.68 | 18.84 | 18.36 | 24.99 |       |       |
|               | 34.87      | 36.59          | 16.75 | 46.18 | 25.43 | 30.80 |       |       |
|               | 22.16      | 18.16          | 13.35 | 24.02 | 14.46 | 23.48 |       |       |
|               | 28.68      | 23.09          | 11.52 | 39.71 | 50.11 | 81.86 |       |       |
|               | 17.74      | 15.57          | 18.67 | 26.96 | 15.26 | 31.10 |       |       |
|               | 22.97      | 27.05          | 14.55 | 30.58 | 12.98 | 19.64 |       |       |
|               | 18.47      | 24.02          | 23.32 | 36.93 | 13.31 | 19.69 |       |       |
|               | 36.89      | 30.03          | 30.16 | 39.38 | 7.37  | 17.85 |       |       |
|               | 20.05      | 23.14          | 11.92 | 41.84 | 12.32 | 30.00 |       |       |
|               | 19.08      | 20.63          | 13.97 | 29.86 | 50.52 | 59.29 |       |       |
|               | 21.81      | 23.87          | 24.73 | 34.28 | 16.15 | 17.26 |       |       |
|               | 15.82      | 16.30          | 10.58 | 19.65 | 10.78 | 21.02 |       |       |
|               | 24.56      | 22.18          | 18.52 | 32.82 | 17.41 | 43.01 |       |       |
|               | 28.37      | 25.42          | 20.50 | 31.47 | 19.25 | 21.37 |       |       |
|               | 16.11      | 18.43          | 13.95 | 19.06 | 28.87 | 27.78 |       |       |
|               | 24.18      | 26.32          | 9.50  | 34.89 | 24.07 | 24.35 |       |       |
|               | 25.86      | 29.05          | 14.13 | 20.05 | 24.44 | 38.72 |       |       |
|               | 24.46      | 21.65          | 32.08 | 56.96 | 38.15 | 52.80 |       |       |
|               | 44.74      | 45.72          | 14.54 | 26.39 | 10.13 | 32.18 |       |       |
|               | 34.93      | 27.65          | 12.18 | 23.61 | 12.55 | 19.54 |       |       |
|               | 33.63      | 39.17          | 18.15 | 18.85 | 10.38 | 17.14 |       |       |
|               | 48.65      | 37.84          | 10.72 | 18.98 | 14.85 | 19.39 |       |       |
| 24.92         | 21.54      | 13.99          | 20.52 | 43.76 | 44.29 |       |       |       |
| 23.29         | 24.21      | 9.46           | 24.59 | 36.18 | 30.03 |       |       |       |
| 45.23         | 32.40      | 12.63          | 25.53 | 14.73 | 12.20 |       |       |       |
| 29.00         | 33.16      | 9.10           | 22.91 | 12.06 | 15.30 |       |       |       |
| 19.29         | 13.78      | 20.01          | 33.13 | 15.62 | 17.43 |       |       |       |
| 23.80         | 18.14      | 27.83          | 34.74 | 39.54 | 33.50 |       |       |       |
| 22.84         | 23.73      | 18.83          | 25.83 | 12.80 | 15.84 |       |       |       |
| 17.09         | 21.14      | 23.21          | 43.63 | 31.18 | 37.42 |       |       |       |
| 26.82         | 22.71      | 11.20          | 22.56 | 38.82 | 40.96 |       |       |       |
| 32.45         | 33.67      | 23.74          | 31.95 | 34.06 | 39.13 |       |       |       |
| 38.24         | 35.54      | 21.65          | 43.91 | 22.22 | 25.56 |       |       |       |
| 31.43         | 23.06      | 10.84          | 17.65 | 53.89 | 27.73 |       |       |       |
| 22.94         | 27.88      | 21.79          | 35.54 | 36.80 | 23.16 |       |       |       |
| 14.89         | 21.20      | 6.73           | 15.74 | 20.88 | 27.57 |       |       |       |
| 36.87         | 38.33      | 19.35          | 37.34 | 24.69 | 36.22 |       |       |       |
|               |            |                |       |       |       |       |       |       |

|               |            |                |       |       |       |       |       |       |
|---------------|------------|----------------|-------|-------|-------|-------|-------|-------|
|               |            |                | 24.03 | 22.52 | 7.93  | 22.12 | 7.38  | 12.74 |
|               |            |                | 26.27 | 25.51 | 24.16 | 29.49 | 19.63 | 41.04 |
|               |            |                | 17.82 | 21.79 | 31.43 | 45.79 | 28.41 | 19.93 |
|               |            |                | 17.10 | 14.83 | 27.69 | 36.06 | 16.52 | 22.56 |
|               |            |                | 22.39 | 19.45 | 7.11  | 15.05 | 11.71 | 9.24  |
| AIP<br>+5 min | TEST<br>AD | VEH<br>-20 min | 18.89 | 19.49 | 15.12 | 24.42 | 25.53 | 35.25 |
|               |            |                | 28.80 | 27.09 | 14.98 | 31.03 | 13.71 | 23.25 |
|               |            |                | 26.43 | 19.99 | 11.91 | 17.71 | 17.38 | 28.26 |
|               |            |                | 24.09 | 18.30 | 14.08 | 20.79 | 13.08 | 22.79 |
|               |            |                | 25.24 | 27.21 | 27.86 | 39.84 | 18.22 | 34.80 |
|               |            |                | 19.54 | 14.50 | 8.04  | 24.95 | 34.53 | 29.55 |
|               |            |                | 22.94 | 29.93 | 30.80 | 43.04 | 32.40 | 41.31 |
|               |            |                | 41.81 | 31.87 | 8.07  | 14.95 | 13.68 | 18.42 |
|               |            |                | 11.24 | 11.47 | 8.78  | 13.88 | 10.91 | 13.48 |
|               |            | 21.40          | 26.66 | 20.92 | 27.76 | 16.52 | 25.89 |       |
|               |            | 30.46          | 31.36 | 23.39 | 25.59 | 24.42 | 37.60 |       |
|               |            | 26.33          | 27.06 | 22.40 | 60.60 | 25.69 | 41.17 |       |
|               |            | 21.71          | 20.30 | 25.93 | 23.52 | 23.99 | 34.10 |       |
|               |            | 29.36          | 24.82 | 31.36 | 57.92 | 23.12 | 34.36 |       |
|               |            | 25.46          | 34.20 | 11.34 | 18.05 | 21.39 | 29.13 |       |
|               |            | 12.68          | 11.68 | 11.08 | 11.88 | 6.64  | 13.71 |       |
|               |            | 22.18          | 18.14 | 22.26 | 28.99 | 26.96 | 27.39 |       |
|               |            | 16.47          | 15.94 | 19.99 | 36.73 | 14.88 | 24.42 |       |
|               | 19.59      | 18.05          | 18.72 | 33.63 | 20.05 | 37.13 |       |       |
|               | 22.00      | 39.45          | 13.21 | 20.79 | 14.25 | 32.63 |       |       |
|               | 18.75      | 20.42          | 12.88 | 20.92 | 25.66 | 26.52 |       |       |
|               | 26.86      | 35.85          | 20.09 | 25.25 | 30.07 | 42.49 |       |       |
|               | 15.62      | 16.68          | 40.95 | 33.72 | 21.90 | 40.83 |       |       |
|               | 18.89      | 14.85          | 20.02 | 20.42 | 8.11  | 20.19 |       |       |
|               | 12.65      | 16.88          | 12.38 | 18.35 | 8.24  | 12.38 |       |       |
|               | 17.72      | 15.25          | 14.38 | 29.06 | 17.08 | 14.45 |       |       |
|               | 33.90      | 28.29          | 5.57  | 12.65 | 14.41 | 28.03 |       |       |
|               | 25.06      | 26.33          | 14.85 | 27.69 | 29.36 | 34.33 |       |       |
|               | 23.29      | 26.76          | 15.08 | 31.43 | 16.38 | 30.00 |       |       |
|               | 11.31      | 11.34          | 15.05 | 15.12 | 14.65 | 21.92 |       |       |
|               | 19.22      | 20.95          | 17.45 | 24.06 | 19.79 | 31.46 |       |       |
|               | 23.79      | 24.52          | 25.52 | 24.55 | 8.14  | 18.99 |       |       |
|               | 14.11      | 18.08          | 18.32 | 24.12 | 12.55 | 26.36 |       |       |
|               | 15.75      | 14.15          | 10.11 | 23.05 | 21.42 | 41.55 |       |       |
|               | 25.69      | 33.13          | 11.85 | 29.30 | 16.42 | 21.76 |       |       |
|               | 24.12      | 32.40          | 10.78 | 18.98 | 11.51 | 24.59 |       |       |
|               | 28.73      | 37.40          | 24.22 | 39.43 | 32.23 | 43.00 |       |       |
|               | 22.52      | 28.33          | 10.08 | 20.85 | 15.58 | 13.78 |       |       |
|               | 17.57      | 18.07          | 14.10 | 24.49 | 28.46 | 46.75 |       |       |
|               | 19.21      | 21.89          | 11.37 | 10.35 | 29.30 | 42.38 |       |       |
|               | 17.84      | 16.35          | 28.66 | 31.77 | 30.26 | 32.89 |       |       |
|               | 14.11      | 11.31          | 7.21  | 13.94 | 20.12 | 25.99 |       |       |
|               | 35.70      | 37.84          | 9.98  | 23.82 | 15.15 | 15.55 |       |       |
|               | 25.23      | 22.32          | 15.15 | 20.65 | 15.52 | 37.34 |       |       |
|               | 33.64      | 24.36          | 22.82 | 39.80 | 15.88 | 22.52 |       |       |
|               | 21.65      | 24.32          | 13.91 | 33.13 | 18.22 | 24.62 |       |       |
|               | 30.06      | 35.54          | 24.82 | 32.23 | 14.45 | 31.43 |       |       |
|               | 17.91      | 20.42          | 21.06 | 13.61 | 5.97  | 15.52 |       |       |
| 16.57         | 22.41      | 8.38           | 18.92 | 24.92 | 21.92 |       |       |       |
| 20.92         | 16.82      | 13.28          | 27.92 | 12.64 | 13.75 |       |       |       |
| 40.81         | 36.24      | 11.91          | 16.92 | 49.12 | 40.77 |       |       |       |
| 17.75         | 13.75      | 10.51          | 17.58 | 25.82 | 28.33 |       |       |       |
| 37.50         | 31.66      | 12.18          | 17.42 | 42.57 | 46.01 |       |       |       |
| 29.63         | 35.90      | 16.55          | 22.52 | 8.91  | 15.35 |       |       |       |
|               |            |                |       |       |       |       |       |       |

|                |            |                |       |       |       |       |       |       |
|----------------|------------|----------------|-------|-------|-------|-------|-------|-------|
|                |            |                | 21.56 | 19.87 | 16.48 | 29.30 | 25.29 | 26.39 |
|                |            |                | 15.20 | 16.82 | 19.05 | 31.63 | 34.57 | 18.39 |
|                |            |                | 21.52 | 19.32 | 12.38 | 17.22 | 14.98 | 18.75 |
|                |            |                | 16.58 | 20.35 | 18.33 | 39.63 | 10.67 | 10.37 |
| ZIP<br>+5 min  | TEST<br>AD | VEH<br>-20 min | 14.68 | 12.18 | 6.41  | 17.82 | 17.28 | 10.41 |
|                |            |                | 23.82 | 24.16 | 11.44 | 8.71  | 22.47 | 28.73 |
|                |            |                | 16.18 | 19.39 | 9.14  | 16.85 | 29.73 | 41.04 |
|                |            |                | 21.32 | 27.99 | 20.25 | 45.95 | 19.75 | 16.92 |
|                |            |                | 20.62 | 21.10 | 12.72 | 20.91 | 21.84 | 19.70 |
|                |            |                | 36.29 | 28.48 | 15.22 | 19.25 | 12.32 | 11.75 |
|                |            |                | 23.85 | 27.91 | 21.91 | 30.70 | 25.94 | 22.27 |
|                |            |                | 43.38 | 47.68 | 19.43 | 33.27 | 38.41 | 26.28 |
|                |            |                | 23.06 | 32.41 | 12.87 | 26.48 | 34.42 | 30.16 |
|                |            | 41.18          | 45.97 | 24.61 | 46.07 | 21.59 | 20.77 |       |
|                |            | SCH<br>-20 min | 31.43 | 27.96 | 7.51  | 23.99 | 20.62 | 36.70 |
|                |            |                | 28.50 | 21.79 | 15.55 | 24.86 | 29.20 | 39.01 |
|                |            |                | 15.55 | 18.20 | 13.81 | 16.18 | 31.33 | 39.41 |
|                |            |                | 24.16 | 32.33 | 13.91 | 14.55 | 9.04  | 19.49 |
|                |            |                | 17.35 | 30.50 | 22.29 | 36.87 | 9.41  | 15.95 |
|                |            |                | 14.28 | 13.25 | 10.74 | 11.68 | 11.38 | 16.92 |
|                |            |                | 19.99 | 14.82 | 22.26 | 34.63 | 22.52 | 21.49 |
|                |            |                | 29.43 | 30.63 | 6.58  | 15.65 | 19.29 | 30.33 |
|                | 31.23      |                | 35.27 | 28.63 | 38.67 | 23.49 | 30.96 |       |
|                | 24.56      | 30.73          | 21.55 | 48.92 | 13.95 | 33.50 |       |       |
|                | TEST<br>BD | VEH<br>-20 min | 28.08 | 22.44 | 30.66 | 49.92 | 11.38 | 15.38 |
|                |            |                | 29.06 | 24.72 | 5.84  | 13.05 | 8.27  | 8.88  |
|                |            |                | 18.82 | 18.70 | 19.52 | 34.03 | 14.79 | 24.09 |
|                |            |                | 29.16 | 24.28 | 28.33 | 37.83 | 19.09 | 25.96 |
|                |            |                | 24.69 | 26.19 | 14.55 | 11.98 | 12.58 | 14.88 |
|                |            |                | 26.93 | 32.93 | 18.65 | 31.33 | 23.19 | 35.20 |
|                |            |                | 17.47 | 19.49 | 12.45 | 23.12 | 18.08 | 28.08 |
|                |            |                | 27.16 | 21.22 | 30.40 | 33.53 | 20.45 | 27.49 |
|                |            |                | 18.80 | 19.70 | 23.09 | 32.00 | 26.06 | 43.86 |
|                |            | 22.20          | 17.50 | 11.20 | 16.00 | 27.47 | 60.17 |       |
|                |            | SCH<br>-20 min | 31.60 | 28.26 | 30.00 | 35.04 | 14.08 | 31.93 |
|                |            |                | 33.43 | 35.84 | 9.84  | 14.21 | 31.80 | 40.41 |
|                |            |                | 28.60 | 25.66 | 28.46 | 37.90 | 19.72 | 27.69 |
|                |            |                | 18.25 | 18.90 | 23.06 | 33.86 | 20.59 | 30.13 |
|                |            |                | 17.84 | 19.19 | 16.72 | 27.46 | 24.20 | 36.66 |
|                |            |                | 23.71 | 27.16 | 12.28 | 31.70 | 28.66 | 45.11 |
|                |            |                | 28.36 | 38.21 | 28.13 | 28.14 | 22.69 | 35.67 |
|                |            |                | 33.13 | 39.14 | 23.86 | 33.47 | 9.31  | 11.31 |
|                | 20.98      |                | 15.54 | 20.78 | 58.71 | 11.00 | 21.00 |       |
|                | TEST<br>CD | VEH<br>-20 min | 33.23 | 24.19 | 22.52 | 37.60 | 37.87 | 25.43 |
| 21.40          |            |                | 16.05 | 28.09 | 36.47 | 33.17 | 26.89 |       |
| 22.66          |            |                | 17.08 | 20.12 | 21.25 | 36.10 | 32.40 |       |
| 21.47          |            |                | 18.17 | 23.66 | 28.70 | 21.09 | 24.89 |       |
| 20.65          |            |                | 19.60 | 22.89 | 50.18 | 25.96 | 24.12 |       |
| 36.00          |            |                | 35.34 | 16.45 | 34.03 | 16.52 | 43.08 |       |
| 26.33          |            |                | 23.86 | 16.95 | 24.59 | 31.40 | 35.60 |       |
| 21.68          |            |                | 18.39 | 17.55 | 30.26 | 18.69 | 20.33 |       |
| 30.10          |            |                | 40.54 | 12.12 | 15.37 | 19.32 | 20.80 |       |
| 34.73          |            | 33.23          | 27.33 | 33.87 | 41.34 | 33.60 |       |       |
| SCH<br>-20 min |            | 15.98          | 14.91 | 23.19 | 27.16 | 20.88 | 30.96 |       |
|                |            | 36.20          | 29.06 | 27.03 | 29.03 | 19.85 | 18.02 |       |
|                |            | 27.76          | 25.73 | 11.44 | 19.29 | 14.81 | 18.39 |       |
|                |            | 29.83          | 26.56 | 32.04 | 46.05 | 10.88 | 26.55 |       |
|                |            | 20.57          | 26.44 | 9.78  | 23.32 | 17.38 | 25.69 |       |

|  |  |  |       |       |       |       |       |       |
|--|--|--|-------|-------|-------|-------|-------|-------|
|  |  |  | 19.67 | 15.56 | 9.94  | 27.93 | 12.68 | 30.63 |
|  |  |  | 32.47 | 33.93 | 19.69 | 16.08 | 10.58 | 17.62 |
|  |  |  | 33.00 | 40.80 | 24.12 | 23.36 | 33.80 | 43.44 |
|  |  |  | 24.76 | 30.25 | 18.30 | 37.85 | 21.00 | 47.52 |
|  |  |  | 11.70 | 13.40 | 30.00 | 40.35 | 23.50 | 36.26 |

| Dataset Figure 1B |         |             | Exploration time (s) |       |              |       |          |       |
|-------------------|---------|-------------|----------------------|-------|--------------|-------|----------|-------|
|                   |         |             | Training             |       | Reactivation |       | Test     |       |
|                   |         |             | A                    | B     | A            | C     | Familiar | Novel |
| VEH +3 h          | TEST AD | VEH -20 min | 19.32                | 34.4  | 19.22        | 32.74 | 22.89    | 37.4  |
|                   |         |             | 33.53                | 31.97 | 17.6         | 22.61 | 17.83    | 35.67 |
|                   |         |             | 17.3                 | 17.8  | 21.52        | 33.73 | 24.42    | 34.53 |
|                   |         |             | 18.28                | 16.07 | 30           | 37.24 | 25.23    | 51.49 |
|                   |         |             | 35.51                | 29.34 | 21.96        | 30.96 | 23.29    | 37.3  |
|                   |         |             | 19                   | 23.72 | 17.28        | 26.53 | 12.05    | 21.16 |
|                   |         |             | 37.14                | 36.57 | 31.2         | 47.21 | 20.08    | 25.1  |
|                   |         | 22.72       | 21.99                | 17.35 | 34.4         | 12.3  | 16.32    |       |
|                   |         | 29.44       | 29.85                | 22.12 | 42.64        | 15.95 | 28.14    |       |
|                   |         | 25.28       | 24.76                | 25.33 | 43.14        | 14.31 | 19.92    |       |
|                   |         | 34.6        | 31.87                | 13.75 | 29.17        | 48.85 | 44.67    |       |
|                   |         | 21.68       | 16.34                | 25.06 | 32.43        | 11.88 | 21.64    |       |
|                   |         | 30.01       | 31.35                | 28.39 | 33.99        | 15.38 | 26.66    |       |
|                   |         | 20.1        | 26.28                | 21.92 | 41.84        | 19.49 | 33.67    |       |
|                   | 18.15   | 21.26       | 18.97                | 29.86 | 42.08        | 66    |          |       |
|                   | 27.39   | 24.3        | 14.64                | 20.52 | 15.82        | 23.59 |          |       |
|                   | 35.88   | 34.43       | 19.48                | 44.15 | 16.12        | 30.03 |          |       |
|                   | 23.27   | 27.73       | 41.87                | 44.8  | 15.28        | 25.8  |          |       |
|                   | 18.73   | 20.61       | 37.12                | 53.77 | 23.03        | 48.95 |          |       |
|                   | 43.02   | 35.31       | 10.18                | 20.62 | 19.85        | 31.74 |          |       |
|                   | 23.91   | 18.76       | 22.33                | 27.79 | 21.72        | 21.83 |          |       |
|                   | 24.18   | 18.86       | 31.65                | 39.93 | 27.95        | 33.7  |          |       |
|                   | 34.07   | 31.87       | 9.72                 | 29.41 | 21.3         | 37.66 |          |       |
|                   | 12.08   | 14.57       | 5.48                 | 18.11 | 16.28        | 22.18 |          |       |
|                   | 22.92   | 30.44       | 20.65                | 33.93 | 10.41        | 33.67 |          |       |
|                   | 24.89   | 33.27       | 25.33                | 32.43 | 26.46        | 39.2  |          |       |
|                   | 23.61   | 26.76       | 16.95                | 28.03 | 19.54        | 23.14 |          |       |
|                   | 23.12   | 23.79       | 17.52                | 30.4  | 10.31        | 14.01 |          |       |
|                   | 43.71   | 47.65       | 40.64                | 37.16 | 23.4         | 42.24 |          |       |
|                   | 34.33   | 28.9        | 33.77                | 51.8  | 38.34        | 38.27 |          |       |
|                   | 21.12   | 15.62       | 12.75                | 10.91 | 10.67        | 18.18 |          |       |
|                   | 18.38   | 24.42       | 7.47                 | 16.88 | 14.6         | 19.58 |          |       |
|                   | 22.92   | 25.89       | 17.16                | 24.92 | 12.48        | 22.28 |          |       |
|                   | 32.20   | 31.63       | 26.46                | 43.21 | 23.19        | 37.17 |          |       |
|                   | 23.56   | 19.25       | 23.32                | 31.89 | 25.36        | 43.12 |          |       |
|                   | 28.36   | 22.07       | 9.21                 | 12.65 | 20.65        | 31.81 |          |       |
|                   | 19.99   | 22.06       | 41.37                | 38.91 | 10.28        | 30.78 |          |       |
|                   | 20.29   | 18.25       | 10.74                | 22.39 | 15.12        | 19.09 |          |       |
|                   | 29.03   | 32.97       | 15.08                | 26.03 | 24.86        | 23.82 |          |       |
|                   | 17.22   | 13.85       | 8.78                 | 16.22 | 19.93        | 30.54 |          |       |
|                   | 24.99   | 22.86       | 15.88                | 26.03 | 23.89        | 33.16 |          |       |
|                   | 25.69   | 24.66       | 12.41                | 27.53 | 21.65        | 32.79 |          |       |
|                   | 25.09   | 29.50       | 13.31                | 16.88 | 20.03        | 25.53 |          |       |
|                   | 16.35   | 20.72       | 20.22                | 27.66 | 11.88        | 15.52 |          |       |
|                   | 23.31   | 21.14       | 32.90                | 39.77 | 23.59        | 31.12 |          |       |
|                   | 26.20   | 30.82       | 23.09                | 35.20 | 20.92        | 37.63 |          |       |
|                   | 13.17   | 11.90       | 18.08                | 14.08 | 16.42        | 26.82 |          |       |
|                   | 17.47   | 19.37       | 30.70                | 38.61 | 19.89        | 32.42 |          |       |
| 21.91             | 20.31   | 24.29       | 32.82                | 20.02 | 39.29        |       |          |       |

|             |            |                |       |       |       |       |       |       |
|-------------|------------|----------------|-------|-------|-------|-------|-------|-------|
| ANI<br>+3 h | TEST<br>AD | VEH<br>-20 min | 18.82 | 17.21 | 14.73 | 27.79 | 17.01 | 27.06 |
|             |            |                | 33.05 | 34.14 | 29.34 | 27.13 | 21.56 | 31.22 |
|             |            |                | 20.93 | 27.56 | 13.29 | 25.69 | 26.99 | 38.27 |
|             |            |                | 32.93 | 36.3  | 21.32 | 36.42 | 29.13 | 41.27 |
|             |            |                | 23.54 | 24.24 | 20.21 | 29.16 | 12.16 | 24.85 |
|             |            |                | 18.93 | 14.35 | 14.71 | 30.12 | 14.85 | 25.27 |
|             |            | 20.36          | 25.43 | 20.33 | 27.16 | 19.29 | 26.79 |       |
|             |            | 29.22          | 35.1  | 22.89 | 32.71 | 36.11 | 37    |       |
|             |            | 14.13          | 17.95 | 21.16 | 29.38 | 12.22 | 22.71 |       |
|             |            | 34.36          | 28.03 | 14    | 20.73 | 22.15 | 30.86 |       |
|             |            | 20.95          | 29.47 | 15.9  | 23.78 | 27.28 | 36.6  |       |
|             |            | 26.79          | 37.65 | 30.53 | 40.31 | 17.26 | 31.19 |       |
|             |            | 39.51          | 35.34 | 21.19 | 38.17 | 15.93 | 34.43 |       |
|             |            | 18.32          | 21.45 | 14.1  | 25.51 | 28.52 | 35.91 |       |
|             |            | 25.49          | 27.26 | 17.58 | 38.54 | 10.87 | 20.37 |       |
|             |            | 11.18          | 11.98 | 16.78 | 22.79 | 9.48  | 12.38 |       |
|             |            | 20.09          | 19.95 | 18.72 | 28.13 | 17.95 | 32.32 |       |
|             |            | 28.53          | 31.33 | 15.26 | 24.82 | 10.81 | 14.11 |       |
|             | 30.46      | 22.96          | 13.35 | 30.3  | 15.22 | 25.28 |       |       |
|             | 20.82      | 27.84          | 15.02 | 22.38 | 18.31 | 25.49 |       |       |
|             | 31.16      | 29.42          | 21.87 | 30.6  | 26.13 | 49.32 |       |       |
|             | 19.62      | 26.9           | 36.44 | 49.52 | 32.73 | 52.69 |       |       |
|             | 30.23      | 40.42          | 35.07 | 58.25 | 18.42 | 37.33 |       |       |
|             | 19.21      | 16.84          | 15.97 | 28.00 | 34.87 | 45.24 |       |       |
|             | 18.90      | 23.66          | 9.61  | 23.91 | 21.39 | 36.27 |       |       |
|             | 25.49      | 32.00          | 25.73 | 30.83 | 9.28  | 28.37 |       |       |
|             | 16.32      | 19.65          | 30.00 | 42.68 | 11.61 | 14.25 |       |       |
|             | 22.19      | 24.99          | 12.81 | 15.98 | 21.25 | 21.22 |       |       |
|             | 37.40      | 31.63          | 25.99 | 39.07 | 18.02 | 26.83 |       |       |
|             | 23.92      | 24.09          | 21.38 | 54.39 | 27.29 | 57.99 |       |       |
|             | 26.59      | 25.89          | 12.18 | 18.62 | 5.31  | 13.05 |       |       |
|             | 25.63      | 19.35          | 18.53 | 27.89 | 23.52 | 24.89 |       |       |
|             | 22.17      | 18.39          | 23.89 | 34.77 | 20.73 | 34.27 |       |       |
|             | 22.16      | 23.86          | 16.02 | 22.62 | 18.55 | 28.58 |       |       |
|             | 35.44      | 34.13          | 20.39 | 28.19 | 23.84 | 34.56 |       |       |
|             | 26.13      | 22.60          | 20.36 | 39.36 | 17.56 | 29.68 |       |       |
|             | 19.27      | 21.17          | 19.92 | 22.49 | 18.77 | 27.89 |       |       |
|             | 22.17      | 19.54          | 23.50 | 31.06 | 14.11 | 21.68 |       |       |
|             | 24.77      | 23.66          | 17.59 | 34.72 | 26.57 | 43.28 |       |       |
|             | 18.25      | 21.28          | 23.32 | 25.19 | 17.88 | 32.52 |       |       |
|             | 36.31      | 30.81          | 20.92 | 32.97 | 19.42 | 36.74 |       |       |
|             | 22.52      | 24.61          | 14.95 | 30.94 | 18.15 | 27.73 |       |       |
|             | 28.70      | 27.66          | 19.79 | 37.84 | 13.84 | 20.49 |       |       |
|             | 33.00      | 27.94          | 17.64 | 36.84 | 12.69 | 31.13 |       |       |
|             | 38.27      | 42.41          | 13.84 | 21.8  | 25.09 | 41.27 |       |       |
|             | 23.39      | 25.16          | 26.24 | 38.43 | 25.25 | 38.06 |       |       |
|             | 31.36      | 36.21          | 12.36 | 39.26 | 42.26 | 38.12 |       |       |

| Dataset Figure 1C |            |                | Exploration time (s) |       |              |       |          |       |
|-------------------|------------|----------------|----------------------|-------|--------------|-------|----------|-------|
|                   |            |                | Training             |       | Reactivation |       | Test     |       |
|                   |            |                | A                    | B     | A            | C     | Familiar | Novel |
| VEH<br>+5 min     | TEST<br>AD | VEH<br>-20 min | 30.23                | 28.94 | 17.85        | 25.54 | 25.11    | 34.14 |
|                   |            |                | 16.44                | 18.53 | 18.22        | 27.18 | 26.14    | 39.89 |
|                   |            |                | 14.13                | 17.95 | 24.26        | 27.53 | 14.39    | 28.62 |
|                   |            |                | 29.95                | 25.22 | 27.72        | 35.97 | 20.43    | 31.86 |
|                   |            |                | 27.22                | 27.59 | 18.90        | 28.87 | 20.96    | 37.29 |
|                   |            |                | 17.59                | 16.27 | 27.83        | 34.74 | 17.98    | 33.32 |
|                   |            |                | 25.68                | 27.45 | 18.83        | 25.83 | 16.20    | 28.69 |

|                |            |                |       |       |       |       |       |       |
|----------------|------------|----------------|-------|-------|-------|-------|-------|-------|
|                | TEST<br>BD | SCH<br>-20 min | 34.17 | 42.27 | 23.21 | 43.63 | 17.25 | 16.75 |
|                |            |                | 33.19 | 21.08 | 17.79 | 25.24 | 24.10 | 37.38 |
|                |            |                | 18.06 | 23.18 | 14.14 | 27.23 | 16.42 | 22.67 |
|                |            |                | 16.73 | 19.74 | 17.09 | 28.73 | 15.30 | 34.10 |
|                |            |                | 24.13 | 33.60 | 19.50 | 29.06 | 14.47 | 23.24 |
|                |            |                | 21.40 | 19.89 | 25.74 | 28.88 | 13.32 | 26.03 |
|                |            |                | 23.63 | 21.41 | 13.59 | 31.67 | 24.23 | 30.38 |
|                |            |                | 34.90 | 37.33 | 23.74 | 31.95 | 17.79 | 24.84 |
|                |            | 29.11          | 23.63 | 21.54 | 39.37 | 23.53 | 37.73 |       |
|                |            | 19.52          | 18.04 | 21.42 | 31.02 | 33.33 | 39.00 |       |
|                |            | 26.85          | 24.54 | 24.32 | 31.73 | 22.12 | 30.12 |       |
|                |            | 21.57          | 18.41 | 45.88 | 53.95 | 15.91 | 34.23 |       |
|                |            | 19.63          | 19.32 | 23.47 | 33.60 | 17.86 | 23.86 |       |
|                |            | 22.43          | 25.32 | 23.72 | 32.21 | 19.74 | 29.67 |       |
|                | 37.33      | 33.52          | 18.86 | 30.66 | 12.46 | 19.74 |       |       |
|                | 26.43      | 25.33          | 14.51 | 23.63 | 11.00 | 16.14 |       |       |
|                | 32.16      | 33.16          | 24.91 | 37.15 | 19.57 | 39.56 |       |       |
|                | 29.06      | 34.40          | 24.00 | 37.23 | 21.13 | 33.21 |       |       |
|                | 20.82      | 23.78          | 17.72 | 24.46 | 13.16 | 22.13 |       |       |
|                | 16.63      | 18.93          | 29.66 | 44.49 | 23.16 | 39.16 |       |       |
|                | 17.02      | 20.55          | 11.24 | 20.31 | 33.26 | 34.15 |       |       |
|                | 16.88      | 18.84          | 13.99 | 23.08 | 18.23 | 23.16 |       |       |
|                | 28.46      | 29.64          | 15.72 | 28.13 | 18.16 | 25.20 |       |       |
|                | 27.19      | 31.92          | 19.02 | 19.95 | 14.15 | 24.50 |       |       |
|                | 16.07      | 14.55          | 32.70 | 28.93 | 20.03 | 27.16 |       |       |
|                | 25.22      | 26.47          | 16.08 | 24    | 22.16 | 34.40 |       |       |
|                | 25.72      | 29.5           | 21.32 | 34.21 | 12.40 | 21.77 |       |       |
|                | 21.74      | 17.32          | 20    | 32.53 | 18.63 | 27.62 |       |       |
|                | 21.15      | 23.59          | 32.5  | 43.71 | 18.25 | 23.02 |       |       |
|                | 28.85      | 32.04          | 25.2  | 30.71 | 21.16 | 31.22 |       |       |
|                | 15.95      | 15.31          | 21.6  | 21.9  | 16.19 | 27.87 |       |       |
|                | 24.76      | 22.74          | 21.24 | 36.87 | 25.56 | 37.98 |       |       |
|                | 24.48      | 27.68          | 24.57 | 39.44 | 26.35 | 33.25 |       |       |
|                | 20.70      | 22.64          | 16.57 | 37.13 | 20.58 | 25.79 |       |       |
|                | 12.65      | 15.93          | 16.13 | 29.60 | 18.91 | 33.76 |       |       |
|                | 19.90      | 25.40          | 10.51 | 14.36 | 22.12 | 30.16 |       |       |
|                | 23.17      | 27.66          | 21.19 | 34.88 | 18.42 | 34.12 |       |       |
|                | 22.36      | 18.27          | 21.84 | 37.81 | 15.91 | 34.23 |       |       |
|                | 36.29      | 47.46          | 24.47 | 43.17 | 20.89 | 31.58 |       |       |
|                | 24.46      | 19.49          | 19.48 | 38.57 | 17.86 | 23.86 |       |       |
|                | 20.89      | 26.18          | 19.15 | 15.68 | 19.74 | 19.67 |       |       |
|                | 20.41      | 18.32          | 15.73 | 25.84 | 20.82 | 41.55 |       |       |
| 22.61          | 24.90      | 19.10          | 29.00 | 19.48 | 29.95 |       |       |       |
| 27.97          | 27.54      | 24.60          | 31.22 | 17.11 | 25.21 |       |       |       |
| 18.08          | 23.17      | 16.85          | 23.38 | 24.09 | 36.16 |       |       |       |
| 32.23          | 37.79      | 19.82          | 27.24 | 10.71 | 20.75 |       |       |       |
| 21.77          | 28.00      | 15.67          | 19.60 | 20.15 | 30.32 |       |       |       |
| 25.19          | 25.49      | 19.84          | 22.25 | 17.97 | 27.91 |       |       |       |
| 15.66          | 12.74      | 22.54          | 38.78 | 23.75 | 33.55 |       |       |       |
| 43.61          | 47.74      | 24.73          | 34.28 | 20.98 | 29.34 |       |       |       |
| 30.25          | 27.63      | 22.43          | 26.49 | 10.59 | 26.86 |       |       |       |
| 27.34          | 21.97      | 23.00          | 30.02 | 26.90 | 39.67 |       |       |       |
| 23.57          | 28.66      | 22.83          | 35.24 | 25.49 | 32.07 |       |       |       |
| 28.34          | 28.79      | 16.92          | 27.77 | 14.49 | 28.55 |       |       |       |
| 29.15          | 31.98      | 18.02          | 31.15 | 29.26 | 34.05 |       |       |       |
| 13.01          | 16.62      | 17.29          | 26.23 | 14.59 | 23.47 |       |       |       |
| 22.06          | 22.14      | 27.13          | 34.94 | 22.27 | 32.71 |       |       |       |
| 19.32          | 34.40      | 19.22          | 32.74 | 22.89 | 37.40 |       |       |       |
| 33.53          | 31.97      | 17.60          | 22.61 | 17.83 | 35.67 |       |       |       |
| sAIP<br>+5 min | TEST<br>AD | VEH<br>-20 min | 20.41 | 18.32 | 15.73 | 25.84 | 20.82 | 41.55 |
|                |            |                | 22.61 | 24.90 | 19.10 | 29.00 | 19.48 | 29.95 |
|                |            |                | 27.97 | 27.54 | 24.60 | 31.22 | 17.11 | 25.21 |
|                |            |                | 18.08 | 23.17 | 16.85 | 23.38 | 24.09 | 36.16 |
|                |            |                | 32.23 | 37.79 | 19.82 | 27.24 | 10.71 | 20.75 |
|                |            |                | 21.77 | 28.00 | 15.67 | 19.60 | 20.15 | 30.32 |
|                |            |                | 25.19 | 25.49 | 19.84 | 22.25 | 17.97 | 27.91 |
|                |            |                | 15.66 | 12.74 | 22.54 | 38.78 | 23.75 | 33.55 |
|                |            | 43.61          | 47.74 | 24.73 | 34.28 | 20.98 | 29.34 |       |
|                |            | 30.25          | 27.63 | 22.43 | 26.49 | 10.59 | 26.86 |       |
|                |            | 27.34          | 21.97 | 23.00 | 30.02 | 26.90 | 39.67 |       |
|                |            | 23.57          | 28.66 | 22.83 | 35.24 | 25.49 | 32.07 |       |
|                |            | 28.34          | 28.79 | 16.92 | 27.77 | 14.49 | 28.55 |       |
|                |            | 29.15          | 31.98 | 18.02 | 31.15 | 29.26 | 34.05 |       |
| 13.01          | 16.62      | 17.29          | 26.23 | 14.59 | 23.47 |       |       |       |
| 22.06          | 22.14      | 27.13          | 34.94 | 22.27 | 32.71 |       |       |       |
| TEST<br>BD     |            | 19.32          | 34.40 | 19.22 | 32.74 | 22.89 | 37.40 |       |
|                |            | 33.53          | 31.97 | 17.60 | 22.61 | 17.83 | 35.67 |       |

|                |            |                |       |       |       |       |       |       |
|----------------|------------|----------------|-------|-------|-------|-------|-------|-------|
|                |            | VEH<br>-20 min | 17.30 | 17.80 | 21.52 | 33.73 | 24.42 | 34.53 |
|                |            |                | 18.28 | 16.07 | 30.00 | 37.24 | 25.23 | 51.49 |
|                |            |                | 35.51 | 29.34 | 21.96 | 30.96 | 23.29 | 37.30 |
|                |            |                | 19.00 | 23.72 | 17.28 | 26.53 | 12.05 | 21.16 |
|                |            |                | 37.14 | 36.57 | 31.20 | 47.21 | 20.08 | 25.10 |
|                |            |                | 22.72 | 21.99 | 17.35 | 34.40 | 10.00 | 20.32 |
|                |            | SCH<br>-20 min | 26.69 | 29.54 | 21.00 | 38.47 | 18.22 | 23.41 |
|                |            |                | 27.91 | 21.82 | 16.12 | 28.95 | 16.05 | 32.15 |
|                |            |                | 25.25 | 20.02 | 16.67 | 21.41 | 23.52 | 35.48 |
|                |            |                | 21.53 | 17.86 | 19.55 | 29.06 | 17.14 | 27.87 |
|                |            |                | 32.83 | 28.62 | 19.09 | 25.63 | 13.21 | 26.91 |
|                |            |                | 27.99 | 24.28 | 18.85 | 28.83 | 21.80 | 27.08 |
|                |            |                | 28.76 | 27.25 | 17.48 | 27.06 | 22.80 | 22.28 |
|                |            |                | 15.29 | 18.72 | 18.52 | 29.93 | 13.26 | 25.33 |
|                | TEST<br>CD | VEH<br>-20 min | 43.02 | 35.31 | 10.18 | 20.62 | 21.72 | 41.83 |
|                |            |                | 48.37 | 37.72 | 31.65 | 39.93 | 21.30 | 37.66 |
|                |            |                | 34.07 | 31.87 | 19.72 | 29.41 | 16.28 | 22.18 |
|                |            |                | 12.08 | 14.57 | 15.48 | 18.11 | 15.92 | 26.26 |
|                |            |                | 27.32 | 29.65 | 20.77 | 35.95 | 20.18 | 37.09 |
|                |            |                | 20.12 | 26.71 | 24.36 | 39.81 | 18.08 | 35.10 |
|                |            | SCH<br>-20 min | 22.08 | 19.87 | 23.20 | 39.79 | 23.31 | 36.24 |
|                |            |                | 23.91 | 18.76 | 22.33 | 27.79 | 27.95 | 33.70 |
|                |            |                | 43.76 | 47.11 | 28.12 | 26.48 | 20.79 | 28.86 |
|                |            |                | 31.63 | 34.87 | 20.14 | 33.55 | 12.65 | 28.53 |
|                |            |                | 34.98 | 38.36 | 18.29 | 29.36 | 13.61 | 29.83 |
|                |            |                | 25.47 | 22.85 | 17.86 | 32.41 | 26.03 | 36.34 |
|                |            |                | 33.37 | 26.43 | 27.08 | 42.13 | 18.69 | 22.06 |
|                |            |                | 16.89 | 15.13 | 19.86 | 28.76 | 11.34 | 37.90 |
| sZIP<br>+5 min | TEST<br>AD | VEH<br>-20 min | 26.34 | 29.47 | 18.46 | 31.45 | 23.50 | 31.22 |
|                |            |                | 14.98 | 20.82 | 22.03 | 35.32 | 16.53 | 20.43 |
|                |            |                | 27.85 | 36.83 | 17.88 | 27.85 | 19.77 | 15.96 |
|                |            |                | 16.13 | 14.53 | 22.41 | 34.93 | 14.10 | 23.30 |
|                |            |                | 30.79 | 26.76 | 15.79 | 26.88 | 21.77 | 44.31 |
|                |            |                | 31.36 | 36.44 | 19.37 | 28.63 | 27.21 | 42.55 |
|                |            |                | 28.47 | 23.17 | 16.10 | 29.67 | 21.03 | 30.77 |
|                |            |                | 22.66 | 21.63 | 16.85 | 29.19 | 21.80 | 45.34 |
|                |            | SCH<br>-20 min | 16.63 | 18.93 | 20.50 | 36.00 | 19.69 | 35.94 |
|                |            |                | 30.84 | 21.99 | 17.79 | 37.46 | 27.70 | 38.22 |
|                |            |                | 37.33 | 33.88 | 15.27 | 25.66 | 15.03 | 29.17 |
|                |            |                | 29.06 | 34.40 | 11.92 | 17.75 | 18.69 | 34.41 |
|                |            |                | 22.00 | 25.71 | 15.75 | 22.95 | 31.23 | 41.00 |
|                |            |                | 18.66 | 17.86 | 24.83 | 47.94 | 20.10 | 43.12 |
|                | TEST<br>BD | VEH<br>-20 min | 21.12 | 24.16 | 25.87 | 33.35 | 22.05 | 27.74 |
|                |            |                | 28.07 | 28.30 | 14.80 | 19.09 | 24.04 | 30.00 |
|                |            |                | 21.91 | 20.31 | 24.29 | 32.82 | 20.02 | 39.29 |
|                |            |                | 18.82 | 17.21 | 14.73 | 27.79 | 17.01 | 27.06 |
|                |            |                | 33.05 | 34.14 | 29.34 | 27.13 | 21.56 | 31.22 |
|                |            |                | 20.93 | 27.56 | 13.29 | 25.69 | 26.99 | 38.27 |
|                |            |                | 32.93 | 36.30 | 21.32 | 36.42 | 29.13 | 41.27 |
|                |            |                | 23.54 | 24.24 | 20.21 | 29.16 | 12.16 | 24.85 |
|                |            | SCH<br>-20 min | 18.93 | 14.35 | 14.71 | 30.12 | 14.85 | 25.27 |
|                |            |                | 20.36 | 25.43 | 20.33 | 27.16 | 19.29 | 26.79 |
|                |            |                | 20.70 | 25.12 | 25.60 | 40.85 | 21.32 | 32.10 |
|                |            |                | 26.02 | 29.39 | 15.92 | 22.66 | 23.27 | 38.65 |
|                |            |                | 17.35 | 17.65 | 19.95 | 36.87 | 25.93 | 37.00 |
|                |            |                | 24.74 | 23.00 | 13.41 | 28.06 | 24.16 | 42.06 |
| 31.83          | 27.88      | 12.12          | 20.04 | 16.82 | 21.82 |       |       |       |



|  |                |                |       |       |       |       |       |       |
|--|----------------|----------------|-------|-------|-------|-------|-------|-------|
|  | TEST<br>CD     | VEH<br>-20 min | 17.54 | 18.91 | 18.18 | 28.60 | 16.12 | 26.26 |
|  |                |                | 19.51 | 16.35 | 17.06 | 37.29 | 17.03 | 27.34 |
|  |                |                | 30.63 | 27.34 | 20.44 | 36.40 | 19.33 | 26.08 |
|  |                |                | 21.26 | 16.66 | 10.19 | 17.48 | 12.46 | 17.74 |
|  |                |                | 38.22 | 34.81 | 18.04 | 27.13 | 22.25 | 27.06 |
|  |                |                | 27.79 | 20.21 | 18.99 | 35.92 | 12.48 | 32.17 |
|  |                |                | 33.35 | 27.05 | 23.44 | 38.79 | 27.70 | 43.65 |
|  |                |                | 27.14 | 27.93 | 20.08 | 31.29 | 21.84 | 34.72 |
|  |                |                | 21.91 | 23.25 | 13.99 | 18.38 | 19.45 | 40.79 |
|  |                |                | 31.94 | 29.02 | 24.11 | 41.59 | 19.42 | 30.98 |
|  | SCH<br>-20 min | 13.12          | 16.54 | 21.03 | 32.02 | 23.06 | 35.69 |       |
|  |                | 29.23          | 27.26 | 11.14 | 22.79 | 10.51 | 18.79 |       |
|  |                | 23.32          | 27.38 | 17.31 | 31.54 | 18.09 | 27.62 |       |
|  |                | 31.43          | 40.01 | 14.05 | 23.82 | 27.18 | 29.86 |       |
|  |                | 18.82          | 25.63 | 17.68 | 21.92 | 17.28 | 27.82 |       |
|  |                | 18.25          | 24.06 | 28.4  | 37.53 | 16.62 | 35.37 |       |
|  |                | 30.33          | 28.43 | 28.09 | 31.1  | 22.06 | 32.40 |       |
|  |                | 39.64          | 36.24 | 22.16 | 36.77 | 21.32 | 37.60 |       |
|  |                | 26.93          | 27.89 | 8.58  | 14.88 | 30.53 | 40.11 |       |

| Dataset Figure 1D |            |                | Exploration time (s) |       |                |       |                |       |          |       |
|-------------------|------------|----------------|----------------------|-------|----------------|-------|----------------|-------|----------|-------|
|                   |            |                | Training             |       | Reactivation 1 |       | Reactivation 2 |       | Test     |       |
|                   |            |                | A                    | B     | A              | C     | C              | D     | Familiar | Novel |
| VEH<br>+5 min     | TEST<br>AE | VEH<br>-20 min | 37.50                | 36.84 | 23.86          | 44.97 | 30.20          | 45.06 | 25.56    | 33.96 |
|                   |            |                | 24.06                | 22.32 | 22.89          | 47.75 | 29.93          | 40.04 | 21.72    | 34.74 |
|                   |            |                | 34.53                | 29.70 | 11.21          | 19.75 | 14.41          | 26.19 | 9.51     | 10.48 |
|                   |            |                | 24.96                | 26.66 | 8.04           | 12.48 | 24.87          | 23.29 | 8.98     | 14.95 |
|                   |            |                | 33.67                | 38.94 | 27.13          | 43.41 | 38.47          | 33.16 | 24.36    | 33.47 |
|                   |            |                | 24.33                | 32.45 | 12.72          | 24.67 | 34.47          | 38.34 | 21.45    | 42.18 |
|                   |            |                | 22.29                | 30.00 | 27.13          | 38.40 | 20.92          | 34.47 | 11.14    | 29.23 |
|                   |            | 25.43          | 25.09                | 18.39 | 23.72          | 13.85 | 28.06          | 15.58 | 23.22    |       |
|                   |            | 34.17          | 34.23                | 22.12 | 35.54          | 9.01  | 20.42          | 20.09 | 33.47    |       |
|                   |            | 30.66          | 37.57                | 9.20  | 20.92          | 26.29 | 39.20          | 19.65 | 28.13    |       |
|                   |            | SCH<br>-20 min | 31.14                | 28.78 | 31.14          | 45.75 | 8.14           | 14.18 | 5.17     | 21.35 |
|                   |            |                | 22.22                | 28.25 | 23.62          | 24.82 | 19.12          | 38.11 | 16.72    | 25.26 |
|                   |            |                | 26.51                | 26.42 | 10.54          | 19.49 | 10.31          | 17.15 | 9.01     | 16.28 |
|                   |            |                | 33.23                | 26.84 | 16.34          | 40.90 | 24.26          | 29.33 | 17.48    | 34.56 |
|                   | 32.63      |                | 24.49                | 17.05 | 24.59          | 20.19 | 22.79          | 16.26 | 13.21    |       |
|                   | 35.04      |                | 27.43                | 12.98 | 25.73          | 18.72 | 33.43          | 23.02 | 29.96    |       |
|                   | 24.62      |                | 24.19                | 17.45 | 22.56          | 25.03 | 31.03          | 27.93 | 46.75    |       |
|                   | 32.97      | 28.36          | 16.58                | 24.86 | 18.85          | 24.86 | 25.79          | 34.17 |          |       |
|                   | 28.63      | 36.64          | 14.01                | 27.43 | 36.64          | 41.47 | 24.62          | 32.30 |          |       |
|                   | TEST<br>BE | VEH<br>-20 min | 27.23                | 29.43 | 18.72          | 20.72 | 13.95          | 19.35 | 26.43    | 37.94 |
|                   |            |                | 38.34                | 36.20 | 26.96          | 41.64 | 27.83          | 24.49 | 15.32    | 21.19 |
|                   |            |                | 35.79                | 26.09 | 24.52          | 34.27 | 31.16          | 43.74 | 28.96    | 42.53 |
|                   |            |                | 25.03                | 24.69 | 23.59          | 42.18 | 37.50          | 42.48 | 21.52    | 58.43 |
|                   |            |                | 37.30                | 28.89 | 28.80          | 36.42 | 26.29          | 35.66 | 24.16    | 40.43 |
|                   |            |                | 18.02                | 23.39 | 8.98           | 18.05 | 25.56          | 38.81 | 16.35    | 22.22 |
|                   |            |                | 31.93                | 27.03 | 13.71          | 31.40 | 14.88          | 16.92 | 16.95    | 24.86 |
|                   |            | 41.57          | 43.14                | 40.21 | 58.59          | 31.46 | 51.52          | 18.89 | 19.61    |       |
|                   |            | 37.80          | 30.79                | 16.12 | 36.27          | 31.30 | 36.84          | 14.61 | 28.29    |       |
| 36.37             |            | 36.77          | 15.66                | 29.15 | 26.47          | 42.80 | 13.82          | 13.53 |          |       |
| 42.21             |            | 26.90          | 34.90                | 52.78 | 30.70          | 44.38 | 27.93          | 37.24 |          |       |
| SCH<br>-20 min    |            | 26.34          | 20.49                | 34.90 | 50.42          | 28.14 | 37.46          | 17.85 | 36.44    |       |
|                   |            | 29.41          | 33.39                | 26.16 | 35.60          | 19.81 | 36.64          | 36.17 | 50.45    |       |
|                   |            | 29.80          | 33.30                | 25.36 | 19.75          | 25.43 | 31.20          | 17.02 | 26.26    |       |
|                   | 28.49      | 24.40          | 16.62                | 44.64 | 25.79          | 46.25 | 27.79          | 52.89 |          |       |
|                   | 24.89      | 23.02          | 15.95                | 43.18 | 25.59          | 62.13 | 22.23          | 28.52 |          |       |

|                |                |                |       |       |       |       |       |       |       |       |
|----------------|----------------|----------------|-------|-------|-------|-------|-------|-------|-------|-------|
|                | TEST<br>CE     |                | 36.75 | 29.43 | 30.34 | 60.35 | 27.77 | 34.32 | 36.82 | 46.51 |
|                |                |                | 33.10 | 29.43 | 17.48 | 25.45 | 17.17 | 26.38 | 28.23 | 25.19 |
|                |                |                | 38.61 | 29.26 | 13.45 | 28.36 | 24.39 | 32.93 | 24.62 | 34.40 |
|                |                |                | 28.63 | 33.07 | 13.48 | 21.52 | 14.38 | 25.73 | 14.11 | 22.52 |
|                |                |                | 23.27 | 24.73 | 24.53 | 24.49 | 17.62 | 27.66 | 9.08  | 18.55 |
|                |                |                | 29.67 | 24.84 | 7.74  | 11.64 | 32.50 | 47.35 | 22.69 | 30.89 |
|                |                | VEH<br>-20 min | 31.66 | 27.86 | 27.03 | 44.58 | 15.84 | 32.60 | 33.53 | 55.82 |
|                |                | 30.96          | 26.59 | 23.09 | 23.22 | 17.22 | 23.99 | 17.48 | 34.87 |       |
|                |                | 25.92          | 31.83 | 19.15 | 26.13 | 27.73 | 26.59 | 26.96 | 39.26 |       |
|                |                | 17.02          | 22.76 | 15.88 | 21.52 | 9.44  | 15.22 | 10.91 | 22.56 |       |
|                |                | 23.32          | 29.73 | 22.56 | 46.31 | 23.16 | 33.97 | 20.22 | 31.79 |       |
|                |                | 26.36          | 20.39 | 22.19 | 22.42 | 14.41 | 12.01 | 13.02 | 20.12 |       |
|                |                | 32.12          | 29.36 | 22.99 | 35.10 | 20.28 | 35.36 | 13.48 | 23.52 |       |
|                |                | 28.00          | 25.45 | 29.00 | 43.84 | 27.13 | 32.67 | 31.56 | 31.23 |       |
|                | 21.95          | 20.26          | 18.99 | 30.53 | 18.69 | 23.82 | 16.22 | 25.73 |       |       |
|                | 22.92          | 23.19          | 18.85 | 34.43 | 22.09 | 28.09 | 11.44 | 15.65 |       |       |
|                | SCH<br>-20 min | 25.83          | 31.33 | 12.00 | 20.85 | 16.25 | 23.49 | 25.13 | 37.33 |       |
|                | 21.93          | 28.54          | 13.94 | 28.22 | 26.39 | 36.70 | 26.26 | 36.84 |       |       |
|                | 21.71          | 23.20          | 16.86 | 30.93 | 23.69 | 30.01 | 26.09 | 38.13 |       |       |
|                | 24.73          | 23.56          | 8.17  | 18.35 | 19.69 | 34.87 | 25.39 | 35.95 |       |       |
|                | 32.18          | 27.20          | 21.32 | 36.94 | 25.96 | 39.25 | 25.26 | 34.76 |       |       |
|                | 29.29          | 25.62          | 18.99 | 43.88 | 10.78 | 36.96 | 25.66 | 36.07 |       |       |
|                | 22.73          | 28.42          | 26.23 | 35.70 | 24.96 | 27.63 | 15.52 | 31.40 |       |       |
|                | 23.62          | 28.60          | 13.45 | 20.19 | 20.77 | 32.87 | 6.77  | 11.41 |       |       |
|                | 21.04          | 29.18          | 9.24  | 46.35 | 19.45 | 25.05 | 12.11 | 23.56 |       |       |
|                | 27.40          | 28.62          | 19.62 | 17.15 | 20.49 | 37.13 | 20.42 | 38.24 |       |       |
|                | TEST<br>DE     | VEH<br>-20 min | 26.13 | 25.76 | 15.35 | 36.30 | 28.70 | 46.57 | 33.30 | 34.53 |
|                |                |                | 35.60 | 41.44 | 11.48 | 42.51 | 41.07 | 44.43 | 17.88 | 34.60 |
| 36.67          |                |                | 37.20 | 14.28 | 49.58 | 32.97 | 45.04 | 31.87 | 38.70 |       |
| 16.62          |                |                | 32.53 | 11.75 | 25.36 | 12.98 | 34.20 | 15.85 | 22.09 |       |
| 33.03          |                |                | 33.67 | 23.29 | 25.73 | 36.04 | 45.38 | 19.49 | 35.20 |       |
| 30.36          |                |                | 36.74 | 10.81 | 10.44 | 23.42 | 25.03 | 6.01  | 15.45 |       |
| 36.50          |                |                | 27.09 | 34.60 | 33.17 | 21.15 | 33.43 | 27.69 | 34.23 |       |
| 22.38          |                | 20.11          | 7.94  | 17.05 | 35.64 | 30.83 | 27.09 | 32.90 |       |       |
| 20.29          |                | 24.62          | 19.25 | 41.24 | 44.84 | 24.42 | 26.26 | 41.54 |       |       |
| SCH<br>-20 min |                | 26.49          | 21.99 | 12.88 | 36.20 | 11.75 | 29.83 | 17.08 | 30.84 |       |
| 26.43          |                | 21.32          | 25.96 | 11.31 | 59.86 | 29.80 | 19.09 | 44.41 |       |       |
| 36.80          |                | 25.66          | 19.72 | 39.07 | 29.10 | 38.63 | 33.00 | 38.67 |       |       |
| 24.79          |                | 34.43          | 16.48 | 14.88 | 13.55 | 23.62 | 6.47  | 12.51 |       |       |
| 21.59          |                | 43.02          | 29.30 | 37.67 | 20.25 | 33.57 | 21.86 | 36.17 |       |       |
| 27.96          | 21.05          | 18.35          | 19.05 | 20.22 | 35.80 | 14.98 | 22.82 |       |       |       |
| 26.63          | 40.44          | 19.59          | 36.90 | 36.64 | 35.90 | 15.62 | 33.26 |       |       |       |
| 31.77          | 31.60          | 23.06          | 35.54 | 20.89 | 23.86 | 17.82 | 25.76 |       |       |       |
| 45.41          | 45.01          | 29.33          | 45.73 | 21.25 | 28.66 | 34.30 | 30.73 |       |       |       |
| 27.43          | 33.37          | 10.28          | 15.68 | 20.25 | 30.02 | 12.88 | 25.26 |       |       |       |
| ANI<br>+5 min  | TEST<br>AE     | VEH<br>-20 min | 25.99 | 23.02 | 26.63 | 35.30 | 10.54 | 29.86 | 14.41 | 24.66 |
|                |                |                | 12.51 | 13.38 | 16.22 | 17.95 | 9.38  | 19.75 | 24.16 | 27.03 |
|                |                |                | 20.75 | 29.03 | 20.12 | 27.19 | 26.79 | 38.44 | 22.26 | 15.25 |
|                |                |                | 20.55 | 23.42 | 17.15 | 19.19 | 21.25 | 26.49 | 19.35 | 23.06 |
|                |                |                | 33.37 | 25.13 | 13.47 | 18.16 | 33.33 | 30.03 | 27.79 | 31.77 |
|                |                |                | 26.56 | 24.85 | 31.07 | 41.04 | 18.95 | 46.68 | 24.66 | 29.40 |
|                |                |                | 35.79 | 26.81 | 20.86 | 60.99 | 36.83 | 54.39 | 47.98 | 38.71 |
|                |                |                | 26.36 | 31.87 | 38.24 | 42.73 | 15.35 | 24.99 | 23.32 | 25.33 |
|                |                | 29.36          | 22.12 | 29.66 | 38.34 | 24.72 | 49.78 | 21.49 | 14.51 |       |
|                |                | 40.81          | 37.00 | 36.57 | 48.65 | 15.28 | 37.10 | 37.10 | 35.57 |       |
|                |                | SCH<br>-20 min | 23.19 | 23.76 | 17.92 | 29.96 | 19.49 | 32.56 | 20.95 | 34.40 |
|                |                | 20.62          | 21.92 | 14.65 | 31.83 | 20.55 | 33.23 | 24.49 | 27.09 |       |
|                |                | 30.23          | 38.10 | 18.65 | 25.13 | 22.09 | 42.18 | 24.39 | 33.87 |       |
|                |                | 36.64          | 31.77 | 20.92 | 27.19 | 35.10 | 40.90 | 30.80 | 34.70 |       |

|  |            |                |       |       |       |       |       |       |       |       |
|--|------------|----------------|-------|-------|-------|-------|-------|-------|-------|-------|
|  |            |                | 35.97 | 43.48 | 20.69 | 42.87 | 38.94 | 49.81 | 13.78 | 29.18 |
|  |            |                | 31.56 | 27.86 | 10.04 | 21.79 | 21.39 | 26.35 | 16.02 | 42.41 |
|  |            |                | 36.27 | 30.20 | 30.83 | 37.54 | 19.42 | 23.75 | 5.57  | 18.02 |
|  |            |                | 37.60 | 39.94 | 15.52 | 25.93 | 17.58 | 28.03 | 25.46 | 26.36 |
|  |            |                | 27.76 | 35.74 | 19.75 | 37.17 | 15.68 | 42.18 | 27.03 | 42.84 |
|  | TEST<br>BE | VEH<br>-20 min | 26.53 | 25.96 | 16.58 | 25.06 | 22.06 | 35.24 | 22.06 | 32.43 |
|  |            |                | 20.35 | 16.52 | 22.52 | 31.36 | 29.10 | 43.54 | 14.74 | 47.72 |
|  |            |                | 21.59 | 23.36 | 28.83 | 30.46 | 12.18 | 22.49 | 12.15 | 18.52 |
|  |            |                | 36.20 | 27.66 | 19.89 | 26.23 | 25.09 | 29.43 | 19.50 | 32.82 |
|  |            |                | 29.26 | 34.50 | 29.90 | 42.64 | 27.99 | 53.42 | 29.86 | 21.96 |
|  |            |                | 28.03 | 28.96 | 11.38 | 17.75 | 17.02 | 34.70 | 15.83 | 19.02 |
|  |            |                | 29.90 | 27.33 | 37.40 | 30.93 | 17.98 | 28.73 | 9.04  | 15.05 |
|  |            |                | 39.41 | 36.17 | 13.61 | 32.90 | 6.27  | 24.09 | 24.04 | 34.84 |
|  |            |                | 20.47 | 20.91 | 14.55 | 18.62 | 24.46 | 32.80 | 19.53 | 34.70 |
|  |            |                | 31.23 | 24.31 | 13.99 | 22.77 | 26.27 | 41.22 | 17.68 | 38.18 |
|  |            | 22.12          | 26.63 | 20.92 | 22.02 | 7.21  | 12.45 | 11.68 | 10.94 |       |
|  |            | 40.86          | 33.03 | 17.08 | 11.78 | 32.20 | 35.13 | 9.21  | 12.64 |       |
|  |            | 26.36          | 19.71 | 16.22 | 31.63 | 22.72 | 38.83 | 22.56 | 31.26 |       |
|  |            | 25.63          | 23.13 | 21.86 | 20.95 | 34.94 | 39.10 | 37.04 | 61.23 |       |
|  |            | 30.43          | 23.22 | 10.68 | 15.62 | 20.02 | 29.78 | 15.25 | 16.95 |       |
|  |            | 24.40          | 26.51 | 19.45 | 17.58 | 18.95 | 29.28 | 20.92 | 18.91 |       |
|  |            | 25.53          | 22.16 | 8.74  | 17.05 | 20.75 | 24.84 | 27.73 | 35.10 |       |
|  |            | 31.70          | 23.99 | 11.31 | 27.92 | 22.38 | 30.07 | 13.95 | 33.07 |       |
|  |            | 34.50          | 39.91 | 10.08 | 26.63 | 33.67 | 33.83 | 6.24  | 17.25 |       |
|  |            | 28.32          | 24.98 | 28.83 | 39.17 | 15.62 | 31.70 | 17.25 | 20.42 |       |
|  | 22.25      | 27.03          | 17.95 | 27.49 | 15.32 | 24.99 | 25.16 | 34.80 |       |       |
|  | 49.42      | 44.37          | 36.97 | 82.38 | 37.57 | 47.38 | 35.70 | 48.45 |       |       |
|  | TEST<br>CE | VEH<br>-20 min | 25.42 | 26.50 | 13.53 | 24.00 | 19.00 | 19.53 | 21.80 | 24.80 |
|  |            |                | 26.11 | 35.26 | 39.87 | 50.32 | 27.33 | 38.10 | 27.12 | 29.23 |
|  |            |                | 20.97 | 19.37 | 5.21  | 12.91 | 22.46 | 34.36 | 28.90 | 24.19 |
|  |            |                | 20.44 | 19.37 | 17.75 | 37.87 | 28.33 | 37.30 | 21.42 | 19.15 |
|  |            |                | 20.13 | 24.11 | 20.32 | 34.67 | 22.56 | 30.89 | 33.10 | 17.85 |
|  |            |                | 17.35 | 22.59 | 9.98  | 14.58 | 7.14  | 11.78 | 15.63 | 43.35 |
|  |            |                | 27.59 | 33.86 | 14.78 | 28.66 | 24.06 | 39.97 | 22.22 | 29.56 |
|  |            |                | 21.19 | 22.66 | 16.85 | 32.37 | 10.11 | 18.89 | 37.10 | 34.90 |
|  |            |                | 20.65 | 14.58 | 11.21 | 13.75 | 7.77  | 37.57 | 16.32 | 18.35 |
|  |            |                | 11.21 | 10.21 | 3.87  | 16.12 | 13.38 | 25.16 | 31.84 | 13.82 |
|  |            | 28.16          | 33.47 | 13.58 | 19.12 | 17.28 | 23.49 | 17.15 | 11.28 |       |
|  |            | 29.63          | 29.23 | 7.00  | 30.80 | 25.50 | 25.99 | 29.50 | 19.99 |       |
|  |            | 25.04          | 20.73 | 10.34 | 17.12 | 18.79 | 28.94 | 21.42 | 28.62 |       |
|  |            | 24.80          | 20.95 | 18.35 | 16.95 | 33.47 | 25.23 | 18.92 | 20.35 |       |
|  |            | 21.10          | 20.60 | 27.96 | 59.53 | 20.99 | 30.83 | 31.26 | 20.02 |       |
|  |            | 19.82          | 25.46 | 10.18 | 25.86 | 29.46 | 40.73 | 23.89 | 23.86 |       |
|  |            | 28.14          | 28.43 | 35.44 | 28.96 | 21.62 | 35.93 | 28.96 | 31.24 |       |
|  |            | 22.40          | 21.42 | 12.01 | 17.95 | 21.39 | 34.56 | 30.30 | 21.52 |       |
|  |            | 26.46          | 25.80 | 12.21 | 15.82 | 13.68 | 8.64  | 32.53 | 33.20 |       |
|  |            | 24.72          | 18.35 | 21.42 | 42.75 | 10.74 | 28.16 | 20.37 | 22.77 |       |
|  | TEST<br>DE | VEH<br>-20 min | 28.70 | 34.40 | 18.45 | 26.66 | 24.26 | 37.20 | 8.01  | 26.30 |
|  |            |                | 10.91 | 12.31 | 10.31 | 11.85 | 25.89 | 34.76 | 19.82 | 21.05 |
|  |            |                | 25.90 | 22.46 | 21.99 | 11.98 | 21.96 | 29.63 | 34.90 | 35.24 |
|  |            |                | 12.28 | 16.68 | 13.65 | 20.99 | 7.14  | 17.81 | 34.84 | 22.96 |
|  |            |                | 27.05 | 30.06 | 14.21 | 25.53 | 27.66 | 24.02 | 18.05 | 18.02 |
|  |            |                | 17.12 | 15.78 | 12.75 | 20.85 | 20.32 | 33.73 | 26.73 | 24.36 |
|  |            |                | 29.79 | 40.01 | 21.12 | 46.31 | 26.23 | 37.40 | 22.39 | 23.59 |
|  |            |                | 22.86 | 24.42 | 18.39 | 31.70 | 33.70 | 49.72 | 27.36 | 30.53 |
|  |            |                | 29.76 | 30.53 | 16.02 | 36.17 | 31.70 | 51.54 | 33.97 | 21.49 |
|  |            |                | 15.25 | 14.48 | 7.57  | 21.08 | 14.51 | 31.78 | 14.08 | 16.11 |
|  | 42.31      | 35.00          | 19.22 | 43.23 | 19.05 | 34.39 | 28.49 | 33.38 |       |       |
|  | 12.71      | 20.49          | 11.24 | 29.90 | 21.00 | 31.29 | 26.80 | 26.06 |       |       |

|  |  |                |       |       |       |       |       |       |       |       |
|--|--|----------------|-------|-------|-------|-------|-------|-------|-------|-------|
|  |  | SCH<br>-20 min | 26.49 | 31.60 | 15.82 | 30.56 | 23.72 | 51.17 | 17.75 | 19.59 |
|  |  |                | 27.19 | 18.82 | 21.42 | 32.70 | 34.50 | 18.08 | 15.98 | 15.72 |
|  |  |                | 22.89 | 21.62 | 16.65 | 20.52 | 24.26 | 30.03 | 18.08 | 19.88 |
|  |  |                | 27.43 | 25.26 | 28.13 | 40.34 | 25.83 | 43.24 | 32.17 | 36.48 |
|  |  |                | 33.60 | 45.71 | 27.43 | 36.70 | 28.53 | 38.00 | 35.34 | 29.46 |
|  |  |                | 23.46 | 22.32 | 18.69 | 13.25 | 21.12 | 43.51 | 20.89 | 13.95 |
|  |  |                | 16.52 | 21.02 | 13.31 | 43.54 | 24.49 | 36.93 | 16.92 | 31.53 |
